# Supplementary material
Source: PubMed Central journal article supplement (PMC6544851)
Supplement: supp_RA119.007520_143077_2_supp_309599_ppcdvk.pdf [file supp_RA119.007520_143077_2_supp_309599_ppcdvk.pdf]

## **Supporting Information**

The N termini of the inhibitory  $\gamma$ -subunits of phosphodiesterase-6 (PDE6) from rod and cone photoreceptors differentially regulate transducin-mediated PDE6 activation

**Xin Wang, David Plaschetzki, and Rick H. Cote\***

### **Contents:**

- **Supplementary Table 1: Sequences used for phylogenetic analysis of the P $\gamma$  subunit of PDE6**
- **Supplementary Figure 1: Schematic diagram of the rod and cone P $\gamma$  constructs used in this study.**

## Supplementary Table 1: Sequences used for phylogenetic analysis of the Py subunit of PDE6

### Genomic pipeline (127 sequences)

|                                      |                                         |
|--------------------------------------|-----------------------------------------|
| Ailuropoda_melanoleuca_17460/1-85    | Gadus_morhua_5614/1-64                  |
| Ailuropoda_melanoleuca_17461/1-87    | Gallus_gallus_27582/1-85                |
| Anas_platyrhynchos_2955/1-111        | Gallus_gallus_28384/1-87                |
| Anolis_carolinensis_12191/1-84       | Gallus_gallus_28385/1-79                |
| Anolis_carolinensis_16475/1-87       | Gasterosteus_aculeatus_18478/1-87       |
| Astyanax_mexicanus_11082/1-86        | Gasterosteus_aculeatus_20602/1-73       |
| Astyanax_mexicanus_11770/1-75        | Gasterosteus_aculeatus_20605/1-86       |
| Astyanax_mexicanus_1181/1-87         | Gasterosteus_aculeatus_20606/1-89       |
| Astyanax_mexicanus_2553/1-54         | Gasterosteus_aculeatus_9119/1-86        |
| Bos_taurus_11693/1-83                | Gasterosteus_aculeatus_9120/1-85        |
| Callithrix_jacchus_34984/1-135       | Gorilla_gorilla_14870/1-83              |
| Callithrix_jacchus_34985/1-136       | Gorilla_gorilla_20228/1-136             |
| Callithrix_jacchus_43687/1-83        | Heterocephalus_glaber_female_11651/1-87 |
| Callorhinchus_milii_25438/1-81       | Heterocephalus_glaber_female_23064/1-82 |
| Callorhinchus_milii_4233/1-118       | Heterocephalus_glaber_female_23065/1-60 |
| Canis_familiaris_16653/1-134         | Homo_sapiens_26296/1-137                |
| Canis_familiaris_18074/1-87          | Homo_sapiens_68699/1-83                 |
| Cavia_porcellus_20697/1-83           | Latimeria_chalumnae_21173/1-101         |
| Cavia_porcellus_20698/1-61           | Lepisosteus_oculatus_14879/1-87         |
| Cavia_porcellus_4061/1-87            | Lepisosteus_oculatus_16048/1-87         |
| Chinchilla_lanigera_22571/1-83       | Lepisosteus_oculatus_7702/1-82          |
| Chinchilla_lanigera_22572/1-62       | Loxodonta_africana_3044/1-87            |
| Chinchilla_lanigera_8423/1-87        | Loxodonta_africana_5602/1-83            |
| Chlorocebus_sabaeus_2176/1-87        | Microcebus_murinus_23782/1-130          |
| Chlorocebus_sabaeus_8152/1-83        | Microtus_ochrogaster_23377/1-89         |
| Cricetulus_griseus_crigri_14738/1-83 | Microtus_ochrogaster_23378/1-83         |
| Cricetulus_griseus_crigri_14739/1-62 | Microtus_ochrogaster_23379/1-61         |
| Danio_rerio_42846/1-87               | Monodelphis_domestica_17561/1-87        |
| Danio_rerio_47179/1-73               | Monodelphis_domestica_4959/1-83         |
| Danio_rerio_48502/1-83               | Mus_musculus_19468/1-87                 |
| Danio_rerio_50194/1-86               | Mus_musculus_37812/1-83                 |
| Dasybus_novemcinctus_25976/1-49      | Mus_musculus_37813/1-61                 |
| Echinops_telfairi_2284/1-83          | Nannospalax_galili_16694/1-83           |
| Equus_caballus_11913/1-83            | Nannospalax_galili_16695/1-77           |
| Equus_caballus_9857/1-103            | Nannospalax_galili_26521/1-87           |
| Erinaceus_europaeus_1245/1-105       | Notamacropus_eugenii_10347/1-83         |
| Erinaceus_europaeus_3516/1-83        | Notamacropus_eugenii_13145/1-90         |
| Felis_catus_1183/1-83                | Oreochromis_niloticus_10484/1-86        |
| Ficedula_albicollis_11806/1-85       | Oreochromis_niloticus_19676/1-75        |
| Ficedula_albicollis_13267/1-91       | Oreochromis_niloticus_22755/1-87        |
| Gadus_morhua_1160/1-87               | Oreochromis_niloticus_6756/1-90         |
| Gadus_morhua_14531/1-71              | Ornithorhynchus_anatinus_20038/1-88     |
| Gadus_morhua_370/1-86                | Oryctolagus_cuniculus_5914/1-84         |
| Gadus_morhua_5609/1-74               | Oryzias_latipes_16438/1-87              |
|                                      | Oryzias_latipes_17852/1-86              |

Oryzias\_latipes\_4988/1-75  
Oryzias\_latipes\_5002/1-90  
Oryzias\_latipes\_5003/1-89  
Oryzias\_latipes\_58/1-74  
Oryzias\_latipes\_8816/1-90  
Otolemur\_garnettii\_7153/1-87  
Otolemur\_garnettii\_9443/1-83  
Ovis\_aries\_19733/1-102  
Pan\_troglodytes\_3892/1-114  
Pelodiscus\_sinensis\_18415/1-83  
Petromyzon\_conelike\_ABO16480.2/1-85  
Petromyzon\_marinus\_7712/1-85  
Petromyzon\_rodlike\_ABO64650.1/1-89  
Poecilia\_formosa\_17882/1-86  
Poecilia\_formosa\_19973/1-87  
Poecilia\_formosa\_2566/1-90  
Poecilia\_formosa\_9349/1-84  
Pteropus\_vampyrus\_14305/1-83  
Pteropus\_vampyrus\_8143/1-133  
Rattus\_norvegicus\_21184/1-87  
Rattus\_norvegicus\_2218/1-83  
Taeniopygia\_guttata\_3199/1-87  
Takifugu\_rubripes\_13225/1-86  
Takifugu\_rubripes\_14467/1-82  
Takifugu\_rubripes\_14468/1-74  
Takifugu\_rubripes\_863/1-85  
Tetraodon\_nigroviridis\_12588/1-86  
Tetraodon\_nigroviridis\_21071/1-38  
Tetraodon\_nigroviridis\_8724/1-86  
Tursiops\_truncatus\_10517/1-83  
Tursiops\_truncatus\_6762/1-135  
Xenopus\_tropicalis\_10241/1-87  
Xenopus\_tropicalis\_11377/1-87  
Xenopus\_tropicalis\_17219/1-87  
Xiphophorus\_maculatus\_12733/1-90  
Xiphophorus\_maculatus\_16735/1-87  
Xiphophorus\_maculatus\_17525/1-84  
Xiphophorus\_maculatus\_6287/1-86

**Lamb et al. (2016) (17 sequences)**

KT749744\_PDE6G\_E\_cirrhatius\_60367-1-1/1-85  
KT749745\_PDE6G\_G\_australis\_31619-1-1/1-144  
KT749746\_PDE6G\_Bluespot\_ray\_30603-2-1/1-108  
KT749747\_PDE6G\_Bamboo\_shark\_28892-1-1/1-108  
KT749748\_PDE6G\_Reef\_shark\_36679-1-1/1-108  
KT749749\_PDE6G\_Florida\_gar\_30259-1-3/1-88  
KT749750\_PDE6G\_Florida\_gar\_30259-2-2/1-88

KT749751\_PDE6G\_Bowfin\_23402-2-1/1-88  
KT749752\_PDE6H\_G\_australis\_57194-6-2/1-85  
KT749753\_PDE6H\_M\_mordax\_36958-1-1/1-86  
KT749754\_PDE6H\_Bluespot\_ray\_36371-5-1/1-82  
KT749755\_PDE6H\_Bamboo\_shark\_56213-1-1/1-80  
KT749756\_PDE6H\_Reef\_shark\_2117-1-1/1-82  
KT749757\_PDE6H1\_Bowfin\_22156-1-1/1-88  
KT749758\_PDE6H2\_Bowfin\_598-1-1/1-88  
KT749759\_PDE6I\_Florida\_gar\_30259-1-1/1-85  
KT749760\_PDE6I\_Florida\_gar\_30259-1-4/1-85

**Muradov et al. (2010) (2 sequences)**

tr|A3RLS1|A3RLS1\_PETMA/1-85  
tr|A4LAP0|A4LAP0\_PETMA/1-89

**Uniprot sequences (185 sequences)**

sp|O55175|CNCG ICTTR/1-83  
sp|P04972|CNRG\_BOVIN/1-87  
sp|P09174|CNRG\_MOUSE/1-87  
sp|P18545|CNRG\_HUMAN/1-87  
sp|P22571|CNCG\_BOVIN/1-83  
sp|P54827|CNRG\_CANLF/1-87  
sp|P61248|CNRG\_FELCA/1-87  
sp|P61249|CNCG\_MOUSE/1-83  
sp|P61250|CNCG\_RAT/1-83  
sp|Q13956|CNCG\_HUMAN/1-83  
sp|Q9EQQ8|CNRG\_CAVPO/1-87  
tr|A0A096N9J5|A0A096N9J5\_PAPAN/1-83  
tr|A0A096NTH2|A0A096NTH2\_PAPAN/1-137  
tr|A0A0C4DGN0|A0A0C4DGN0\_HUMAN/1-137  
tr|A0A0C9RFF7|A0A0C9RFF7\_9HYME/1-1035  
tr|A0A0D9R7N0|A0A0D9R7N0\_CHLSB/1-83  
tr|A0A0D9S4J7|A0A0D9S4J7\_CHLSB/1-87  
tr|A0A0G2K704|A0A0G2K704\_RAT/1-31  
tr|A0A0N4SVI4|A0A0N4SVI4\_MOUSE/1-61  
tr|A0A0N4SVP6|A0A0N4SVP6\_MOUSE/1-73  
tr|A0A0P7TZ62|A0A0P7TZ62\_9TELE/1-87  
tr|A0A0P7XRW5|A0A0P7XRW5\_9TELE/1-87  
tr|A0A0S3NUI1|A0A0S3NUI1\_9MURI/1-87  
tr|A0A151LZ42|A0A151LZ42\_ALLMI/1-85  
tr|A0A151NJX3|A0A151NJX3\_ALLMI/1-90  
tr|A0A1A7XSH9|A0A1A7XSH9\_9TELE/1-87  
tr|A0A1A8K860|A0A1A8K860\_NOTKU/1-136  
tr|A0A1A8LB32|A0A1A8LB32\_9TELE/1-136  
tr|A0A1A8N6S4|A0A1A8N6S4\_9TELE/1-95  
tr|A0A1A8UVS3|A0A1A8UVS3\_NOTFU/1-137  
tr|A0A1D5PL58|A0A1D5PL58\_CHICK/1-79

tr|A0A1L5JHJ3|A0A1L5JHJ3\_DELLE/1-83  
tr|A0A1S3ADJ1|A0A1S3ADJ1\_ERIEU/1-83  
tr|A0A1S3AGQ4|A0A1S3AGQ4\_ERIEU/1-87  
tr|A0A1S3FXJ2|A0A1S3FXJ2\_DIPOR/1-83  
tr|A0A1S3GII1|A0A1S3GII1\_DIPOR/1-87  
tr|A0A1U7QIM8|A0A1U7QIM8\_MESAU/1-84  
tr|A0A1U7RJ03|A0A1U7RJ03\_ALLSI/1-85  
tr|A0A1U7SBW4|A0A1U7SBW4\_ALLSI/1-90  
tr|A0A1U7SGP9|A0A1U7SGP9\_TARSY/1-87  
tr|A0A1U7UAV4|A0A1U7UAV4\_TARSY/1-83  
tr|A0A1V4J9V2|A0A1V4J9V2\_PATFA/1-85  
tr|A0A1V4KWW0|A0A1V4KWW0\_PATFA/1-87  
tr|A0A212D7D6|A0A212D7D6\_CEREH/1-87  
tr|A0A218ULY0|A0A218ULY0\_9PASE/1-87  
tr|A0A218V101|A0A218V101\_9PASE/1-85  
tr|A0A286XFJ1|A0A286XFJ1\_CAVPO/1-83  
tr|A0A287AXH0|A0A287AXH0\_PIG/1-83  
tr|A0A287BDB7|A0A287BDB7\_PIG/1-88  
tr|A0A287BKP3|A0A287BKP3\_PIG/1-107  
tr|A0A2D0S3I4|A0A2D0S3I4 ICTPU/1-75  
tr|A0A2I0LIZ3|A0A2I0LIZ3\_COLLI/1-87  
tr|A0A2I0MJJ9|A0A2I0MJJ9\_COLLI/1-85  
tr|A0A2I3T3T8|A0A2I3T3T8\_PANTR/1-137  
tr|A0A2I4CIL5|A0A2I4CIL5\_9TELE/1-87  
tr|A0A2J8JG62|A0A2J8JG62\_PANTR/1-87  
tr|A0A2J8JG65|A0A2J8JG65\_PANTR/1-70  
tr|A0A2J8SQQ1|A0A2J8SQQ1\_PONAB/1-83  
tr|A0A2J8Y2N0|A0A2J8Y2N0\_PONAB/1-70  
tr|A0A2J8Y2T8|A0A2J8Y2T8\_PONAB/1-87  
tr|A0A2K5CY70|A0A2K5CY70\_AOTNA/1-83  
tr|A0A2K5E4Q2|A0A2K5E4Q2\_AOTNA/1-137  
tr|A0A2K5HZC3|A0A2K5HZC3\_COLAP/1-85  
tr|A0A2K5JHT0|A0A2K5JHT0\_COLAP/1-137  
tr|A0A2K5MHS6|A0A2K5MHS6\_CERAT/1-83  
tr|A0A2K5N8N2|A0A2K5N8N2\_CERAT/1-137  
tr|A0A2K5Q3I1|A0A2K5Q3I1\_CEBCA/1-83  
tr|A0A2K5R6F6|A0A2K5R6F6\_CEBCA/1-135  
tr|A0A2K5WEW0|A0A2K5WEW0\_MACFA/1-137  
tr|A0A2K5Z0F0|A0A2K5Z0F0\_MANLE/1-83  
tr|A0A2K6ACZ0|A0A2K6ACZ0\_MANLE/1-87  
tr|A0A2K6E1A3|A0A2K6E1A3\_MACNE/1-83  
tr|A0A2K6E7F1|A0A2K6E7F1\_MACNE/1-137  
tr|A0A2K6EM49|A0A2K6EM49\_PROCO/1-87  
tr|A0A2K6F6Z6|A0A2K6F6Z6\_PROCO/1-83  
tr|A0A2K6K1R7|A0A2K6K1R7\_RHIBE/1-83  
tr|A0A2K6L4L5|A0A2K6L4L5\_RHIBE/1-136  
tr|A0A2K6RPS5|A0A2K6RPS5\_RHIRO/1-83

tr|A0A2K6SHS9|A0A2K6SHS9\_SAIBB/1-130  
tr|A0A2K6SV03|A0A2K6SV03\_SAIBB/1-83  
tr|A0A2R8MS48|A0A2R8MS48\_CALJA/1-87  
tr|A0A2R8N3S8|A0A2R8N3S8\_CALJA/1-83  
tr|A0A2R9BKZ5|A0A2R9BKZ5\_PANPA/1-83  
tr|A0A2U3W8G5|A0A2U3W8G5\_ODORO/1-87  
tr|A0A2U3WEK2|A0A2U3WEK2\_ODORO/1-83  
tr|A0A2U3XQU8|A0A2U3XQU8\_LEPWE/1-83  
tr|A0A2U3YHS1|A0A2U3YHS1\_LEPWE/1-87  
tr|A0A2U4BL46|A0A2U4BL46\_TURTR/1-83  
tr|A0A2U8BQR5|A0A2U8BQR5\_HYPTO/1-85  
tr|A0A2U8BQR8|A0A2U8BQR8\_ARIEL/1-87  
tr|A0A2U8BQS4|A0A2U8BQS4\_9SAUR/1-87  
tr|A0A2U8BQS6|A0A2U8BQS6\_HYPTO/1-87  
tr|A0A2U8BQS8|A0A2U8BQS8\_CEMCO/1-85  
tr|A0A2U8BQS9|A0A2U8BQS9\_CEMCO/1-87  
tr|A0A2U8BQT7|A0A2U8BQT7\_ARIEL/1-85  
tr|A0A2U8BQT9|A0A2U8BQT9\_LAMGE/1-85  
tr|A0A2U8BQU9|A0A2U8BQU9\_LAMGE/1-87  
tr|A0A2U8BQV0|A0A2U8BQV0\_PANGU/1-85  
tr|A0A2U8BQV3|A0A2U8BQV3\_9SAUR/1-85  
tr|A0A2U8BQX0|A0A2U8BQX0\_9SAUR/1-85  
tr|A0A2U8BR01|A0A2U8BR01\_9SAUR/1-87  
tr|A0A2U8BR66|A0A2U8BR66\_PANGU/1-87  
tr|A0A2Y9ERR2|A0A2Y9ERR2\_PHYCD/1-83  
tr|A0A2Y9FMY7|A0A2Y9FMY7\_PHYCD/1-87  
tr|A0A2Y9GBP1|A0A2Y9GBP1\_NEOSC/1-87  
tr|A0A2Y9H426|A0A2Y9H426\_NEOSC/1-83  
tr|A0A2Y9PK10|A0A2Y9PK10\_DELLE/1-87  
tr|A4IHC2|A4IHC2\_XENTR/1-87  
tr|A4II06|A4II06\_XENTR/1-87  
tr|A5LG11|A5LG11\_CYPCA/1-87  
tr|A5LG12|A5LG12\_CYPCA/1-86  
tr|A5LG13|A5LG13\_CYPCA/1-72  
tr|A7YYF9|A7YYF9\_DANRE/1-87  
tr|B3RFI9|B3RFI9\_MOUSE/1-34  
tr|B3RFM9|B3RFM9\_MOUSE/1-31  
tr|D2HZV0|D2HZV0\_AILME/1-83  
tr|E2RBG4|E2RBG4\_CANLF/1-134  
tr|E7BS24|E7BS24\_SORAR/1-32  
tr|E7BS25|E7BS25\_TRAEU/1-32  
tr|E7BS26|E7BS26\_HIPCO/1-32  
tr|E7BS27|E7BS27\_CRATH/1-32  
tr|E7BS28|E7BS28\_DESRO/1-32  
tr|E7BS29|E7BS29\_ERIEU/1-32  
tr|F6ZK66|F6ZK66\_ORNAN/1-88  
tr|F7AU16|F7AU16\_HORSE/1-83

tr|F7BEA5|F7BEA5\_HORSE/1-103  
tr|F7CXV2|F7CXV2\_MONDO/1-87  
tr|F7EJP2|F7EJP2\_MONDO/1-83  
tr|G1KQM6|G1KQM6\_ANOCA/1-87  
tr|G1KUR7|G1KUR7\_ANOCA/1-84  
tr|G1MGS4|G1MGS4\_AILME/1-85  
tr|G1MGS6|G1MGS6\_AILME/1-87  
tr|G1N3U3|G1N3U3\_MELGA/1-87  
tr|G1NGX5|G1NGX5\_MELGA/1-85  
tr|G1Q599|G1Q599\_MYOLU/1-83  
tr|G1QV84|G1QV84\_NOMLE/1-83  
tr|G1RZM1|G1RZM1\_NOMLE/1-126  
tr|G1SQ50|G1SQ50\_RABIT/1-84  
tr|G3R088|G3R088\_GORGO/1-83  
tr|G3SVK4|G3SVK4\_LOXAF/1-83  
tr|G3UN95|G3UN95\_LOXAF/1-87  
tr|G3WIX9|G3WIX9\_SARHA/1-87  
tr|G5BJ67|G5BJ67\_HETGA/1-87  
tr|G7PJY4|G7PJY4\_MACFA/1-83  
tr|H0VZP9|H0VZP9\_CAVPO/1-61  
tr|H0X2X2|H0X2X2\_OTOGA/1-83  
tr|H0X450|H0X450\_OTOGA/1-87  
tr|H0ZFX3|H0ZFX3\_TAEGU/1-69  
tr|H0ZZV3|H0ZZV3\_TAEGU/1-87  
tr|H1AAN5|H1AAN5\_LITCT/1-87  
tr|H2MFC3|H2MFC3\_ORYLA/1-87  
tr|H2NGQ3|H2NGQ3\_PONAB/1-76  
tr|H2NV18|H2NV18\_PONAB/1-137  
tr|H2Q5J0|H2Q5J0\_PANTR/1-83  
tr|H2SLD9|H2SLD9\_TAKRU/1-86  
tr|H3BCE4|H3BCE4\_LATCH/1-101  
tr|I3KNR1|I3KNR1\_ORENI/1-87  
tr|I3L446|I3L446\_HUMAN/1-70  
tr|I3LVY2|I3LVY2\_ICTR/1-87  
tr|K7GDK3|K7GDK3\_PELSI/1-83  
tr|M0R4R9|M0R4R9\_RAT/1-87  
tr|M3VZK9|M3VZK9\_FELCA/1-61  
tr|M3YJ69|M3YJ69\_MUSPF/1-91  
tr|M3YJH7|M3YJH7\_MUSPF/1-83  
tr|Q542R6|Q542R6\_MOUSE/1-87  
tr|Q66IX8|Q66IX8\_XENLA/1-87  
tr|Q6GLT6|Q6GLT6\_XENLA/1-87  
tr|Q6GLU4|Q6GLU4\_XENLA/1-87  
tr|Q6PBP4|Q6PBP4\_DANRE/1-73  
tr|Q7ZVI5|Q7ZVI5\_DANRE/1-87  
tr|Q802E3|Q802E3\_CHICK/1-85  
tr|Q802E4|Q802E4\_CHICK/1-87

tr|Q8MKG5|Q8MKG5\_PIG/1-33  
tr|Q8UUY2|Q8UUY2\_LITPI/1-87  
tr|Q90WW9|Q90WW9\_DANRE/1-50  
tr|Q9ESC9|Q9ESC9\_MOUSE/1-61  
tr|ROJKZ7|ROJKZ7\_ANAPL/1-111  
tr|U3I6Q8|U3I6Q8\_ANAPL/1-69  
tr|U3J6V5|U3J6V5\_ANAPL/1-38  
tr|U3K9U0|U3K9U0\_FICAL/1-85  
tr|U3KE15|U3KE15\_FICAL/1-91  
tr|V8PHL7|V8PHL7\_OPHHA/1-87  
tr|W5MH33|W5MH33\_LEPOC/1-82  
tr|W5QAI6|W5QAI6\_SHEEP/1-102  
tr|W5QHN4|W5QHN4\_SHEEP/1-83

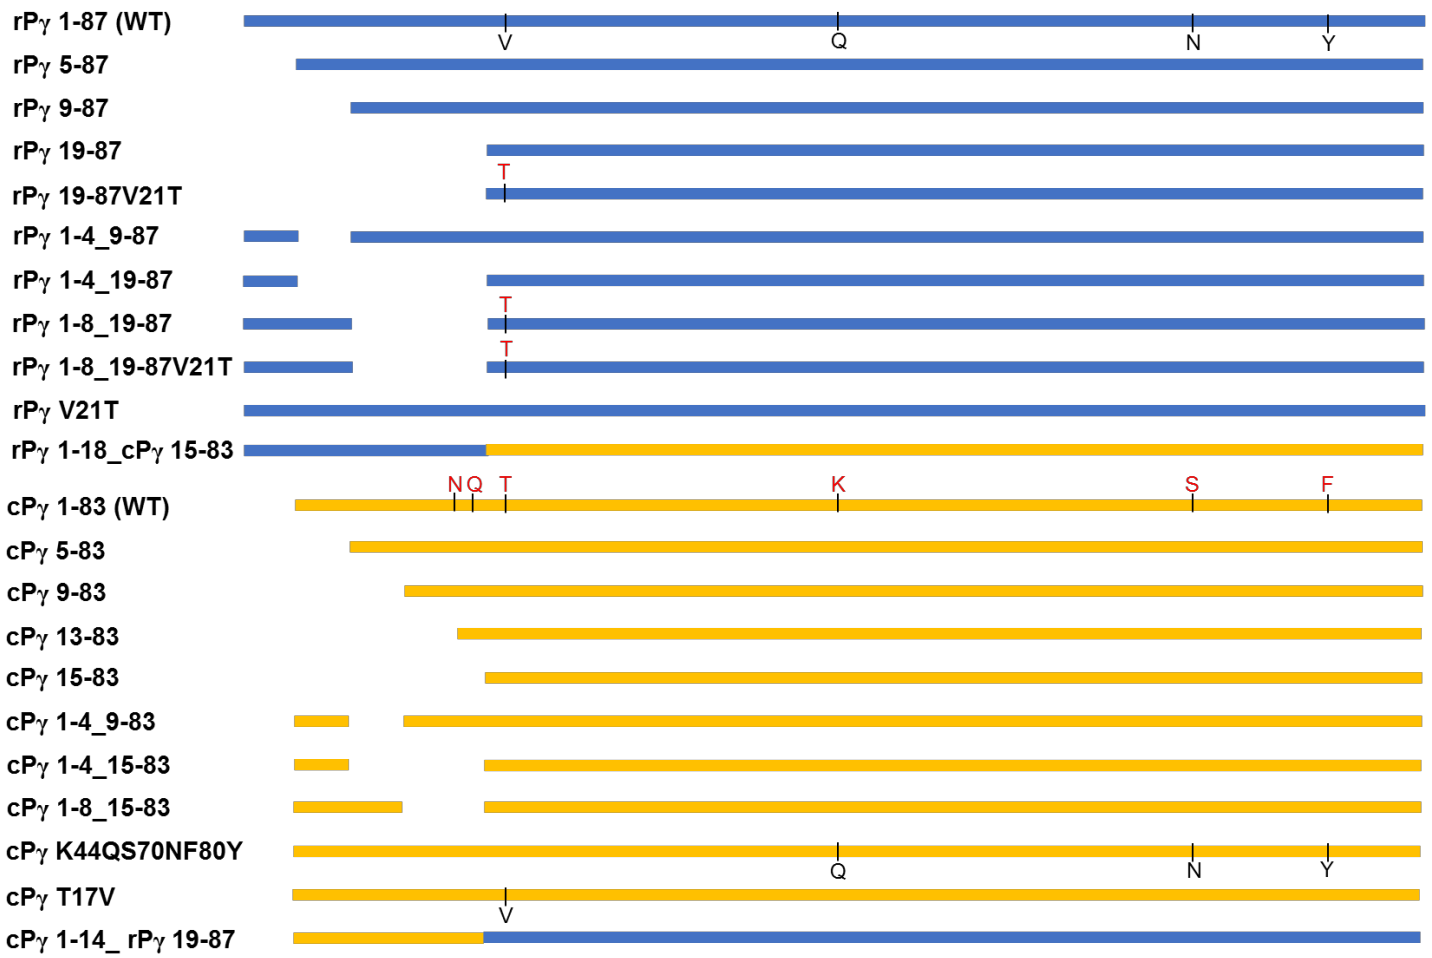

**Figure S1.** Schematic diagram of the rod and cone P $\gamma$  constructs used in this study.
